# Supplementary material
Source: Springer Nature journal article supplement (https://www.springermedizin.de/resource/supplementary/40478_2013_134_MOESM6_ESM.pdf/25658058)
Supplement: MOESM6 [file 25658058]

**Title:** The *Arctic APP* mutation leads to Alzheimer's disease pathology with highly variable topographic deposition of differentially truncated A $\beta$

**Journal:** Acta Neuropathologica Communications

**Authors:** Hannu Kalimo<sup>1</sup>, Maciej Lalowski, Nenad Bogdanovic, Ola Philipson, Thomas D. Bird, David Nochlin, Gerard D. Schellenberg, RoseMarie Brundin, Tommie Olofsson, Marc Baumann, Oliver Wirths, Thomas A. Bayer, Lars N.G. Nilsson, Hans Basun, Lars Lannfelt, Martin Ingelsson

**Corresponding author:** <sup>1</sup>Hannu Kalimo, Department of Pathology, University and University Hospital of Helsinki, Helsinki, Finland,

**E-mail:** hannu.kalimo@helsinki.fi

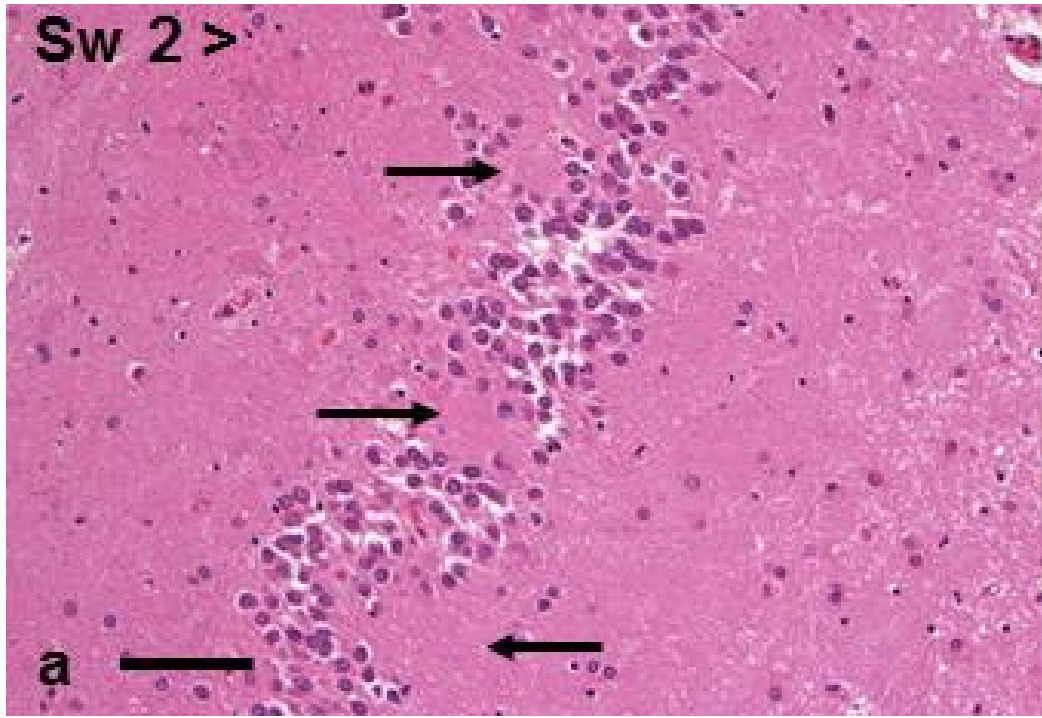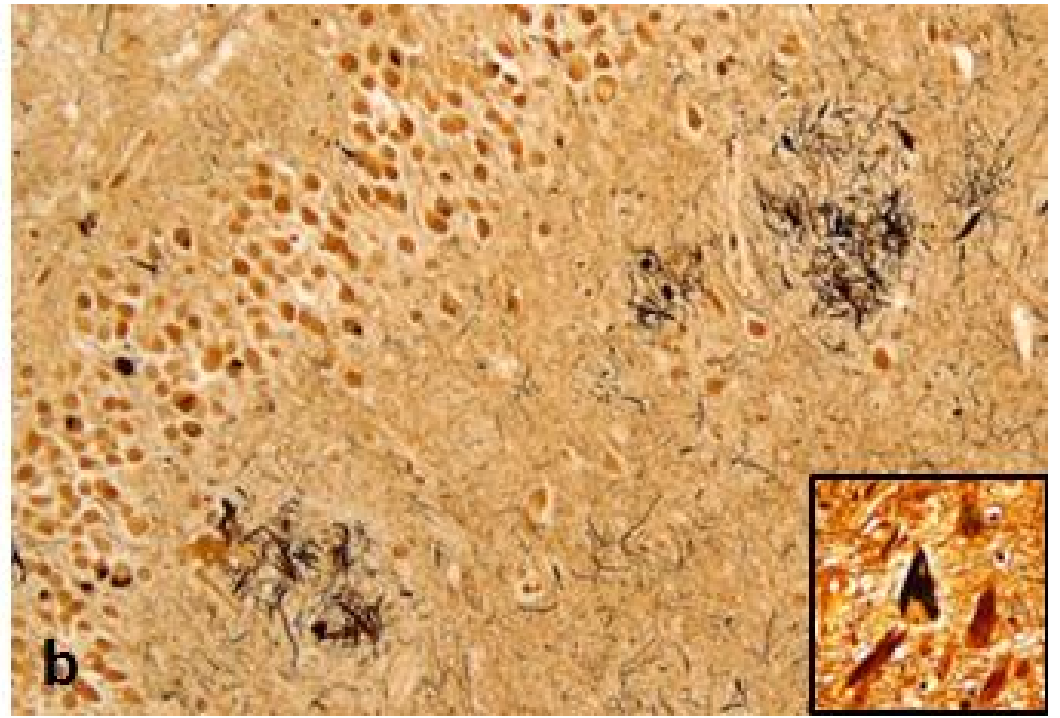

**Suppl. Fig. 3** Sw2 patient's hippocampus. **a:** In H&E stained sections the plaques are difficult to discern, except when they are located within the dentate gyrus displacing granule cells (arrows). **b:** With Bielschowsky silver impregnation DNs within plaques are clearly visible, whereas plaques themselves are inconspicuous. **Inset:** NFT in a hippocampal pyramidal neuron is strongly silver positive. (*bar in a* 100  $\mu$ m for **a** and **b**)
